# Supplementary material for: Ontology-based representation and analysis of host-Brucella interactions
Source: PubMed Central journal article supplement (PMC4594885; doi:10.1186/s13326-015-0036-y), 2015-10-05
Supplement: 13326_2015_36_MOESM3_ESM.pdf [file 13326_2015_36_MOESM3_ESM.pdf]

### Supplemental file 3 – SPARQL queries of *Brucella* mutants that are attenuated inside macrophages during the macrophage-*Brucella* interactions

This supplemental file includes two scripts, both related to the queries of *Brucella* mutants that are attenuated inside macrophages during the macrophage-*Brucella* interactions.

- Query 1: SPARQL query of **the total number of** *Brucella* mutants that are attenuated inside macrophages during a macrophage-*Brucella* interaction (IDO\_0100832).
- Query 2: SPARQL query of **the list of** *Brucella* mutants that are attenuated inside macrophages during a macrophage-*Brucella* interaction (IDO\_0100832).

**Note:** each mutant is associated with one gene and one protein. Therefore, these queries also found those virulence genes and protein virulence factors that participate in various macrophage-*Brucella* interactions.

```
#####
#this query was running on http://sparql.hegroup.org/sparql
# Date: on 3/23/2015
# IDOBRU version: 86
#
#####

#SPARQL query 1: the total number of Brucella mutants that are attenuated inside macrophages during
a macrophage-Brucella interaction
#
# IDO_0100879 attenuated disposition;
# IDO_0100832 macrophage-Brucella interaction;
# BFO_0000051 has part
# BFO_0000112 has disposition at some time
# BFO_0000054 realized in

prefix rdf: <http://www.w3.org/1999/02/22-rdf-syntax-ns#>
prefix owl: <http://www.w3.org/2002/07/owl#>

SELECT (count(distinct ?s) as ?count)
from <http://purl.obolibrary.org/obo/merged/IDOBRU>

WHERE {
?s rdfs:subClassOf ?n6 .
?n6 owl:complementOf ?n7.
?n7 owl:onProperty <http://purl.obolibrary.org/obo/BFO_0000051>; owl:someValuesFrom ?p.
{
SELECT ?s
WHERE
{
?n rdfs:subClassOf ?n1 .
?n1 owl:onProperty <http://purl.obolibrary.org/obo/BFO_0000112>; owl:someValuesFrom ?n2.
?n2 owl:intersectionOf ?n3 .
```

```

?n3 rdf:first <http://purl.obolibrary.org/obo/IDO_0100879>; rdf:rest ?n4 .
?n4 rdf:first ?n5 .
?n5 owl:onProperty <http://purl.obolibrary.org/obo/BFO_0000054>; owl:someValuesFrom
<http://purl.obolibrary.org/obo/IDO_0100832> .
?s rdfs:subClassOf ?n .
}
}
FILTER REGEX(str(?p), "PR") .
}

```

```

#####
#Result: (as returned by the server on 3/24/2015 12:18pm)
count
269
#####

```

```

#SPARQL query 2: the list of Brucella mutants that are attenuated inside macrophages during a
macrophage-Brucella interaction
#
# IDO_0100879 attenuated disposition;
# IDO_0100832 macrophage-Brucella interaction;
# BFO_0000051 has part
# BFO_0000112 has disposition at some time
# BFO_0000054 realized in

```

```

prefix rdf: <http://www.w3.org/1999/02/22-rdf-syntax-ns#>
prefix owl: <http://www.w3.org/2002/07/owl#>

```

```

SELECT distinct ?s ?l

```

```

from <http://purl.obolibrary.org/obo/merged/IDOBRO>

```

```

WHERE {
?s rdfs:subClassOf ?n6 .
?n6 owl:complementOf ?n7.
?n7 owl:onProperty <http://purl.obolibrary.org/obo/BFO_0000051>; owl:someValuesFrom ?p.
?s rdfs:label ?l .
{
SELECT ?s
WHERE
{
?n rdfs:subClassOf ?n1 .
?n1 owl:onProperty <http://purl.obolibrary.org/obo/BFO_0000112>; owl:someValuesFrom ?n2.
?n2 owl:intersectionOf ?n3 .
?n3 rdf:first <http://purl.obolibrary.org/obo/IDO_0100879>; rdf:rest ?n4 .
?n4 rdf:first ?n5 .
?n5 owl:onProperty <http://purl.obolibrary.org/obo/BFO_0000054>; owl:someValuesFrom
<http://purl.obolibrary.org/obo/IDO_0100832> .

```

```
?s rdfs:subClassOf ?n .
}
}
FILTER REGEX(str(?p), "PR") .
}
```

#####

# Result: (as returned by the server on 3/24/2015 12:20pm)

(269 rows)

| s                                                                                                   | l                         |
|-----------------------------------------------------------------------------------------------------|---------------------------|
| <a href="http://purl.obolibrary.org/obo/IDO_0110000">http://purl.obolibrary.org/obo/IDO_0110000</a> | B. suis 1330 rbsK mutant  |
| <a href="http://purl.obolibrary.org/obo/IDO_0110001">http://purl.obolibrary.org/obo/IDO_0110001</a> | B. suis 1330 mgtB mutant  |
| <a href="http://purl.obolibrary.org/obo/IDO_0110002">http://purl.obolibrary.org/obo/IDO_0110002</a> | B. suis 1330 nodV mutant  |
| <a href="http://purl.obolibrary.org/obo/IDO_0110006">http://purl.obolibrary.org/obo/IDO_0110006</a> | B. suis 1330 virB9 mutant |
| <a href="http://purl.obolibrary.org/obo/IDO_0110009">http://purl.obolibrary.org/obo/IDO_0110009</a> | B. suis 1330 virB5 mutant |
| <a href="http://purl.obolibrary.org/obo/IDO_0110010">http://purl.obolibrary.org/obo/IDO_0110010</a> | B. suis 1330 virB4 mutant |
| <a href="http://purl.obolibrary.org/obo/IDO_0110012">http://purl.obolibrary.org/obo/IDO_0110012</a> | B. suis 1330 virB2 mutant |
| <a href="http://purl.obolibrary.org/obo/IDO_0110013">http://purl.obolibrary.org/obo/IDO_0110013</a> | B. suis 1330 virB1 mutant |
| <a href="http://purl.obolibrary.org/obo/IDO_0110014">http://purl.obolibrary.org/obo/IDO_0110014</a> | B. suis 1330 hemH mutant  |
| <a href="http://purl.obolibrary.org/obo/IDO_0110017">http://purl.obolibrary.org/obo/IDO_0110017</a> | B. suis 1330 vjbR mutant  |
| <a href="http://purl.obolibrary.org/obo/IDO_0110018">http://purl.obolibrary.org/obo/IDO_0110018</a> | B. suis 1330 gtrB mutant  |
| <a href="http://purl.obolibrary.org/obo/IDO_0110019">http://purl.obolibrary.org/obo/IDO_0110019</a> | B. suis 1330 deoR mutant  |
| <a href="http://purl.obolibrary.org/obo/IDO_0110021">http://purl.obolibrary.org/obo/IDO_0110021</a> | B. suis 1330 gntR mutant  |
| <a href="http://purl.obolibrary.org/obo/IDO_0110022">http://purl.obolibrary.org/obo/IDO_0110022</a> | B. suis 1330 caiB mutant  |
| <a href="http://purl.obolibrary.org/obo/IDO_0110024">http://purl.obolibrary.org/obo/IDO_0110024</a> | B. suis 1330 norD mutant  |
| <a href="http://purl.obolibrary.org/obo/IDO_0110025">http://purl.obolibrary.org/obo/IDO_0110025</a> | B. suis 1330 narG mutant  |
| <a href="http://purl.obolibrary.org/obo/IDO_0110027">http://purl.obolibrary.org/obo/IDO_0110027</a> | B. suis 1330 wbpW mutant  |
| <a href="http://purl.obolibrary.org/obo/IDO_0110028">http://purl.obolibrary.org/obo/IDO_0110028</a> | B. suis 1330 manB mutant  |
| <a href="http://purl.obolibrary.org/obo/IDO_0110030">http://purl.obolibrary.org/obo/IDO_0110030</a> | B. suis 1330 xfp mutant   |
| <a href="http://purl.obolibrary.org/obo/IDO_0110031">http://purl.obolibrary.org/obo/IDO_0110031</a> | B. suis 1330 glpK mutant  |
| <a href="http://purl.obolibrary.org/obo/IDO_0110034">http://purl.obolibrary.org/obo/IDO_0110034</a> | B. suis 1330 cydC mutant  |
| <a href="http://purl.obolibrary.org/obo/IDO_0110036">http://purl.obolibrary.org/obo/IDO_0110036</a> | B. suis 1330 rbsC mutant  |
| <a href="http://purl.obolibrary.org/obo/IDO_0110038">http://purl.obolibrary.org/obo/IDO_0110038</a> | B. suis 1330 aidB mutant  |
| <a href="http://purl.obolibrary.org/obo/IDO_0110044">http://purl.obolibrary.org/obo/IDO_0110044</a> | B. suis 1330 fbpA mutant  |
| <a href="http://purl.obolibrary.org/obo/IDO_0110045">http://purl.obolibrary.org/obo/IDO_0110045</a> | B. suis 1330 sodC mutant  |
| <a href="http://purl.obolibrary.org/obo/IDO_0110048">http://purl.obolibrary.org/obo/IDO_0110048</a> | B. suis 1330 gcvT mutant  |
| <a href="http://purl.obolibrary.org/obo/IDO_0110050">http://purl.obolibrary.org/obo/IDO_0110050</a> | B. suis 1330 zwf mutant   |
| <a href="http://purl.obolibrary.org/obo/IDO_0110051">http://purl.obolibrary.org/obo/IDO_0110051</a> | B. suis 1330 nikA mutant  |
| <a href="http://purl.obolibrary.org/obo/IDO_0110052">http://purl.obolibrary.org/obo/IDO_0110052</a> | B. suis 1330 galcD mutant |
| <a href="http://purl.obolibrary.org/obo/IDO_0110053">http://purl.obolibrary.org/obo/IDO_0110053</a> | B. suis 1330 eryB mutant  |
| <a href="http://purl.obolibrary.org/obo/IDO_0110057">http://purl.obolibrary.org/obo/IDO_0110057</a> | B. suis 1330 dacF mutant  |
| <a href="http://purl.obolibrary.org/obo/IDO_0110058">http://purl.obolibrary.org/obo/IDO_0110058</a> | B. suis 1330 cobW mutant  |
| <a href="http://purl.obolibrary.org/obo/IDO_0110059">http://purl.obolibrary.org/obo/IDO_0110059</a> | B. suis 1330 dppA mutant  |

|                                                                                                     |                           |
|-----------------------------------------------------------------------------------------------------|---------------------------|
| <a href="http://purl.obolibrary.org/obo/IDO_0110060">http://purl.obolibrary.org/obo/IDO_0110060</a> | B. suis 1330 znuA mutant  |
| <a href="http://purl.obolibrary.org/obo/IDO_0110061">http://purl.obolibrary.org/obo/IDO_0110061</a> | B. suis 1330 znuC mutant  |
| <a href="http://purl.obolibrary.org/obo/IDO_0110065">http://purl.obolibrary.org/obo/IDO_0110065</a> | B. suis 1330 rpsA mutant  |
| <a href="http://purl.obolibrary.org/obo/IDO_0110066">http://purl.obolibrary.org/obo/IDO_0110066</a> | B. suis 1330 pheA mutant  |
| <a href="http://purl.obolibrary.org/obo/IDO_0110068">http://purl.obolibrary.org/obo/IDO_0110068</a> | B. suis 1330 ilvD mutant  |
| <a href="http://purl.obolibrary.org/obo/IDO_0110070">http://purl.obolibrary.org/obo/IDO_0110070</a> | B. suis 1330 glnD mutant  |
| <a href="http://purl.obolibrary.org/obo/IDO_0110071">http://purl.obolibrary.org/obo/IDO_0110071</a> | B. suis 1330 cysI mutant  |
| <a href="http://purl.obolibrary.org/obo/IDO_0110072">http://purl.obolibrary.org/obo/IDO_0110072</a> | B. suis 1330 metH mutant  |
| <a href="http://purl.obolibrary.org/obo/IDO_0110073">http://purl.obolibrary.org/obo/IDO_0110073</a> | B. suis 1330 malK mutant  |
| <a href="http://purl.obolibrary.org/obo/IDO_0110074">http://purl.obolibrary.org/obo/IDO_0110074</a> | B. suis 1330 hisD mutant  |
| <a href="http://purl.obolibrary.org/obo/IDO_0110075">http://purl.obolibrary.org/obo/IDO_0110075</a> | B. suis 1330 pgi mutant   |
| <a href="http://purl.obolibrary.org/obo/IDO_0110077">http://purl.obolibrary.org/obo/IDO_0110077</a> | B. suis 1330 vsrB mutant  |
| <a href="http://purl.obolibrary.org/obo/IDO_0110078">http://purl.obolibrary.org/obo/IDO_0110078</a> | B. suis 1330 bacA mutant  |
| <a href="http://purl.obolibrary.org/obo/IDO_0110079">http://purl.obolibrary.org/obo/IDO_0110079</a> | B. suis 1330 purD mutant  |
| <a href="http://purl.obolibrary.org/obo/IDO_0110080">http://purl.obolibrary.org/obo/IDO_0110080</a> | B. suis 1330 aroC mutant  |
| <a href="http://purl.obolibrary.org/obo/IDO_0110082">http://purl.obolibrary.org/obo/IDO_0110082</a> | B. suis 1330 purF mutant  |
| <a href="http://purl.obolibrary.org/obo/IDO_0110084">http://purl.obolibrary.org/obo/IDO_0110084</a> | B. suis 1330 thrC mutant  |
| <a href="http://purl.obolibrary.org/obo/IDO_0110085">http://purl.obolibrary.org/obo/IDO_0110085</a> | B. suis 1330 dsbA mutant  |
| <a href="http://purl.obolibrary.org/obo/IDO_0110086">http://purl.obolibrary.org/obo/IDO_0110086</a> | B. suis 1330 wbpL mutant  |
| <a href="http://purl.obolibrary.org/obo/IDO_0110088">http://purl.obolibrary.org/obo/IDO_0110088</a> | B. suis 1330 rfbD mutant  |
| <a href="http://purl.obolibrary.org/obo/IDO_0110089">http://purl.obolibrary.org/obo/IDO_0110089</a> | B. suis 1330 perA mutant  |
| <a href="http://purl.obolibrary.org/obo/IDO_0110092">http://purl.obolibrary.org/obo/IDO_0110092</a> | B. suis 1330 pmm mutant   |
| <a href="http://purl.obolibrary.org/obo/IDO_0110093">http://purl.obolibrary.org/obo/IDO_0110093</a> | B. suis 1330 wbpZ mutant  |
| <a href="http://purl.obolibrary.org/obo/IDO_0110094">http://purl.obolibrary.org/obo/IDO_0110094</a> | B. suis 1330 feuP mutant  |
| <a href="http://purl.obolibrary.org/obo/IDO_0110095">http://purl.obolibrary.org/obo/IDO_0110095</a> | B. suis 1330 feuQ mutant  |
| <a href="http://purl.obolibrary.org/obo/IDO_0110096">http://purl.obolibrary.org/obo/IDO_0110096</a> | B. suis 1330 htrA mutant  |
| <a href="http://purl.obolibrary.org/obo/IDO_0110097">http://purl.obolibrary.org/obo/IDO_0110097</a> | B. suis 1330 lpsA mutant  |
| <a href="http://purl.obolibrary.org/obo/IDO_0110099">http://purl.obolibrary.org/obo/IDO_0110099</a> | B. suis 1330 spotT mutant |
| <a href="http://purl.obolibrary.org/obo/IDO_0110104">http://purl.obolibrary.org/obo/IDO_0110104</a> | B. suis 1330 glyA mutant  |
| <a href="http://purl.obolibrary.org/obo/IDO_0110105">http://purl.obolibrary.org/obo/IDO_0110105</a> | B. suis 1330 purL mutant  |
| <a href="http://purl.obolibrary.org/obo/IDO_0110107">http://purl.obolibrary.org/obo/IDO_0110107</a> | B. suis 1330 dsbA mutant  |
| <a href="http://purl.obolibrary.org/obo/IDO_0110108">http://purl.obolibrary.org/obo/IDO_0110108</a> | B. suis 1330 amiC mutant  |
| <a href="http://purl.obolibrary.org/obo/IDO_0110109">http://purl.obolibrary.org/obo/IDO_0110109</a> | B. suis 1330 nifS mutant  |
| <a href="http://purl.obolibrary.org/obo/IDO_0110110">http://purl.obolibrary.org/obo/IDO_0110110</a> | B. suis 1330 dsbA mutant  |
| <a href="http://purl.obolibrary.org/obo/IDO_0110112">http://purl.obolibrary.org/obo/IDO_0110112</a> | B. suis 1330 wbdA mutant  |
| <a href="http://purl.obolibrary.org/obo/IDO_0110113">http://purl.obolibrary.org/obo/IDO_0110113</a> | B. suis 1330 glnA mutant  |
| <a href="http://purl.obolibrary.org/obo/IDO_0110114">http://purl.obolibrary.org/obo/IDO_0110114</a> | B. suis 1330 cysK mutant  |
| <a href="http://purl.obolibrary.org/obo/IDO_0110115">http://purl.obolibrary.org/obo/IDO_0110115</a> | B. suis 1330 caiB mutant  |
| <a href="http://purl.obolibrary.org/obo/IDO_0110116">http://purl.obolibrary.org/obo/IDO_0110116</a> | B. suis 1330 uvrA mutant  |
| <a href="http://purl.obolibrary.org/obo/IDO_0110118">http://purl.obolibrary.org/obo/IDO_0110118</a> | B. suis 1330 hfq mutant   |
| <a href="http://purl.obolibrary.org/obo/IDO_0110121">http://purl.obolibrary.org/obo/IDO_0110121</a> | B. suis 1330 ppiD mutant  |
| <a href="http://purl.obolibrary.org/obo/IDO_0110122">http://purl.obolibrary.org/obo/IDO_0110122</a> | B. suis 1330 uppS mutant  |
| <a href="http://purl.obolibrary.org/obo/IDO_0110125">http://purl.obolibrary.org/obo/IDO_0110125</a> | B. suis 1330 gloA mutant  |

|                                                                                                     |                                   |
|-----------------------------------------------------------------------------------------------------|-----------------------------------|
| <a href="http://purl.obolibrary.org/obo/IDO_0110127">http://purl.obolibrary.org/obo/IDO_0110127</a> | B. suis 1330 aspB mutant          |
| <a href="http://purl.obolibrary.org/obo/IDO_0110129">http://purl.obolibrary.org/obo/IDO_0110129</a> | B. suis 1330 miaA mutant          |
| <a href="http://purl.obolibrary.org/obo/IDO_0110130">http://purl.obolibrary.org/obo/IDO_0110130</a> | B. suis 1330 serB mutant          |
| <a href="http://purl.obolibrary.org/obo/IDO_0110131">http://purl.obolibrary.org/obo/IDO_0110131</a> | B. suis 1330 pncA mutant          |
| <a href="http://purl.obolibrary.org/obo/IDO_0110132">http://purl.obolibrary.org/obo/IDO_0110132</a> | B. suis 1330 pncA mutant          |
| <a href="http://purl.obolibrary.org/obo/IDO_0110134">http://purl.obolibrary.org/obo/IDO_0110134</a> | B. suis 1330 lysR mutant          |
| <a href="http://purl.obolibrary.org/obo/IDO_0110135">http://purl.obolibrary.org/obo/IDO_0110135</a> | B. suis 1330 pth mutant           |
| <a href="http://purl.obolibrary.org/obo/IDO_0110136">http://purl.obolibrary.org/obo/IDO_0110136</a> | B. suis 1330 leuA mutant          |
| <a href="http://purl.obolibrary.org/obo/IDO_0110137">http://purl.obolibrary.org/obo/IDO_0110137</a> | B. suis 1330 dsbB mutant          |
| <a href="http://purl.obolibrary.org/obo/IDO_0110138">http://purl.obolibrary.org/obo/IDO_0110138</a> | B. suis 1330 alkA mutant          |
| <a href="http://purl.obolibrary.org/obo/IDO_0110139">http://purl.obolibrary.org/obo/IDO_0110139</a> | B. suis 1330 macA mutant          |
| <a href="http://purl.obolibrary.org/obo/IDO_0110140">http://purl.obolibrary.org/obo/IDO_0110140</a> | B. suis 1330 dut mutant           |
| <a href="http://purl.obolibrary.org/obo/IDO_0110141">http://purl.obolibrary.org/obo/IDO_0110141</a> | B. suis 1330 ansC mutant          |
| <a href="http://purl.obolibrary.org/obo/IDO_0110142">http://purl.obolibrary.org/obo/IDO_0110142</a> | B. suis 1330 purE mutant          |
| <a href="http://purl.obolibrary.org/obo/IDO_0110143">http://purl.obolibrary.org/obo/IDO_0110143</a> | B. suis 1330 pyc mutant           |
| <a href="http://purl.obolibrary.org/obo/IDO_0110145">http://purl.obolibrary.org/obo/IDO_0110145</a> | B. suis 1330 purH mutant          |
| <a href="http://purl.obolibrary.org/obo/IDO_0110146">http://purl.obolibrary.org/obo/IDO_0110146</a> | B. suis 1330 leuC mutant          |
| <a href="http://purl.obolibrary.org/obo/IDO_0110147">http://purl.obolibrary.org/obo/IDO_0110147</a> | B. suis 1330 rplS mutant          |
| <a href="http://purl.obolibrary.org/obo/IDO_0110149">http://purl.obolibrary.org/obo/IDO_0110149</a> | B. suis 1330 lysA mutant          |
| <a href="http://purl.obolibrary.org/obo/IDO_0110150">http://purl.obolibrary.org/obo/IDO_0110150</a> | B. suis 1330 hpt mutant           |
| <a href="http://purl.obolibrary.org/obo/IDO_0110152">http://purl.obolibrary.org/obo/IDO_0110152</a> | B. suis 1330 hisF mutant          |
| <a href="http://purl.obolibrary.org/obo/IDO_0110153">http://purl.obolibrary.org/obo/IDO_0110153</a> | B. suis 1330 bvrR mutant          |
| <a href="http://purl.obolibrary.org/obo/IDO_0110154">http://purl.obolibrary.org/obo/IDO_0110154</a> | B. suis 1330 bvrS mutant          |
| <a href="http://purl.obolibrary.org/obo/IDO_0110155">http://purl.obolibrary.org/obo/IDO_0110155</a> | B. suis 1330 dnaK mutant          |
| <a href="http://purl.obolibrary.org/obo/IDO_0110156">http://purl.obolibrary.org/obo/IDO_0110156</a> | B. suis 1330 pmtA mutant          |
| <a href="http://purl.obolibrary.org/obo/IDO_0110158">http://purl.obolibrary.org/obo/IDO_0110158</a> | B. melitensis 16M hpt mutant      |
| <a href="http://purl.obolibrary.org/obo/IDO_0110159">http://purl.obolibrary.org/obo/IDO_0110159</a> | B. melitensis 16M lysA mutant     |
| <a href="http://purl.obolibrary.org/obo/IDO_0110160">http://purl.obolibrary.org/obo/IDO_0110160</a> | B. melitensis 16M BMEI0085 mutant |
| <a href="http://purl.obolibrary.org/obo/IDO_0110162">http://purl.obolibrary.org/obo/IDO_0110162</a> | B. melitensis 16M rplS mutant     |
| <a href="http://purl.obolibrary.org/obo/IDO_0110163">http://purl.obolibrary.org/obo/IDO_0110163</a> | B. melitensis 16M leuC mutant     |
| <a href="http://purl.obolibrary.org/obo/IDO_0110165">http://purl.obolibrary.org/obo/IDO_0110165</a> | B. melitensis 16M pstP mutant     |
| <a href="http://purl.obolibrary.org/obo/IDO_0110166">http://purl.obolibrary.org/obo/IDO_0110166</a> | B. melitensis 16M purH mutant     |
| <a href="http://purl.obolibrary.org/obo/IDO_0110168">http://purl.obolibrary.org/obo/IDO_0110168</a> | B. melitensis 16M pyc mutant      |
| <a href="http://purl.obolibrary.org/obo/IDO_0110170">http://purl.obolibrary.org/obo/IDO_0110170</a> | B. melitensis 16M mgps mutant     |
| <a href="http://purl.obolibrary.org/obo/IDO_0110171">http://purl.obolibrary.org/obo/IDO_0110171</a> | B. melitensis 16M purE mutant     |
| <a href="http://purl.obolibrary.org/obo/IDO_0110174">http://purl.obolibrary.org/obo/IDO_0110174</a> | B. melitensis 16M ansC mutant     |
| <a href="http://purl.obolibrary.org/obo/IDO_0110175">http://purl.obolibrary.org/obo/IDO_0110175</a> | B. melitensis 16M dut mutant      |
| <a href="http://purl.obolibrary.org/obo/IDO_0110176">http://purl.obolibrary.org/obo/IDO_0110176</a> | B. melitensis 16M macA mutant     |
| <a href="http://purl.obolibrary.org/obo/IDO_0110177">http://purl.obolibrary.org/obo/IDO_0110177</a> | B. melitensis 16M alkA mutant     |
| <a href="http://purl.obolibrary.org/obo/IDO_0110178">http://purl.obolibrary.org/obo/IDO_0110178</a> | B. melitensis 16M dsbB mutant     |
| <a href="http://purl.obolibrary.org/obo/IDO_0110180">http://purl.obolibrary.org/obo/IDO_0110180</a> | B. melitensis 16M dppA mutant     |
| <a href="http://purl.obolibrary.org/obo/IDO_0110181">http://purl.obolibrary.org/obo/IDO_0110181</a> | B. melitensis 16M leuA mutant     |
| <a href="http://purl.obolibrary.org/obo/IDO_0110182">http://purl.obolibrary.org/obo/IDO_0110182</a> | B. melitensis 16M BMEI0455 mutant |

|                                                                                                     |                                   |
|-----------------------------------------------------------------------------------------------------|-----------------------------------|
| <a href="http://purl.obolibrary.org/obo/IDO_0110183">http://purl.obolibrary.org/obo/IDO_0110183</a> | B. melitensis 16M pth mutant      |
| <a href="http://purl.obolibrary.org/obo/IDO_0110184">http://purl.obolibrary.org/obo/IDO_0110184</a> | B. melitensis 16M lpsB mutant     |
| <a href="http://purl.obolibrary.org/obo/IDO_0110186">http://purl.obolibrary.org/obo/IDO_0110186</a> | B. melitensis 16M lysR mutant     |
| <a href="http://purl.obolibrary.org/obo/IDO_0110188">http://purl.obolibrary.org/obo/IDO_0110188</a> | B. melitensis 16M carAB mutant    |
| <a href="http://purl.obolibrary.org/obo/IDO_0110189">http://purl.obolibrary.org/obo/IDO_0110189</a> | B. melitensis 16M pncA mutant     |
| <a href="http://purl.obolibrary.org/obo/IDO_0110190">http://purl.obolibrary.org/obo/IDO_0110190</a> | B. melitensis 16M bicA mutant     |
| <a href="http://purl.obolibrary.org/obo/IDO_0110191">http://purl.obolibrary.org/obo/IDO_0110191</a> | B. melitensis 16M serB mutant     |
| <a href="http://purl.obolibrary.org/obo/IDO_0110192">http://purl.obolibrary.org/obo/IDO_0110192</a> | B. melitensis 16M miaA mutant     |
| <a href="http://purl.obolibrary.org/obo/IDO_0110193">http://purl.obolibrary.org/obo/IDO_0110193</a> | B. melitensis 16M ilvI mutant     |
| <a href="http://purl.obolibrary.org/obo/IDO_0110195">http://purl.obolibrary.org/obo/IDO_0110195</a> | B. melitensis 16M aspB mutant     |
| <a href="http://purl.obolibrary.org/obo/IDO_0110196">http://purl.obolibrary.org/obo/IDO_0110196</a> | B. melitensis 16M BMEI0671 mutant |
| <a href="http://purl.obolibrary.org/obo/IDO_0110198">http://purl.obolibrary.org/obo/IDO_0110198</a> | B. melitensis 16M thrA mutant     |
| <a href="http://purl.obolibrary.org/obo/IDO_0110199">http://purl.obolibrary.org/obo/IDO_0110199</a> | B. melitensis 16M gloA mutant     |
| <a href="http://purl.obolibrary.org/obo/IDO_0110202">http://purl.obolibrary.org/obo/IDO_0110202</a> | B. melitensis 16M uppS mutant     |
| <a href="http://purl.obolibrary.org/obo/IDO_0110203">http://purl.obolibrary.org/obo/IDO_0110203</a> | B. melitensis 16M ppiD mutant     |
| <a href="http://purl.obolibrary.org/obo/IDO_0110205">http://purl.obolibrary.org/obo/IDO_0110205</a> | B. melitensis 16M hfq mutant      |
| <a href="http://purl.obolibrary.org/obo/IDO_0110207">http://purl.obolibrary.org/obo/IDO_0110207</a> | B. melitensis 16M uvrA mutant     |
| <a href="http://purl.obolibrary.org/obo/IDO_0110209">http://purl.obolibrary.org/obo/IDO_0110209</a> | B. melitensis 16M caiB mutant     |
| <a href="http://purl.obolibrary.org/obo/IDO_0110210">http://purl.obolibrary.org/obo/IDO_0110210</a> | B. melitensis 16M cysK mutant     |
| <a href="http://purl.obolibrary.org/obo/IDO_0110211">http://purl.obolibrary.org/obo/IDO_0110211</a> | B. melitensis 16M glnA mutant     |
| <a href="http://purl.obolibrary.org/obo/IDO_0110212">http://purl.obolibrary.org/obo/IDO_0110212</a> | B. melitensis 16M wbdA mutant     |
| <a href="http://purl.obolibrary.org/obo/IDO_0110214">http://purl.obolibrary.org/obo/IDO_0110214</a> | B. melitensis 16M dsbA mutant     |
| <a href="http://purl.obolibrary.org/obo/IDO_0110215">http://purl.obolibrary.org/obo/IDO_0110215</a> | B. melitensis 16M nifS mutant     |
| <a href="http://purl.obolibrary.org/obo/IDO_0110216">http://purl.obolibrary.org/obo/IDO_0110216</a> | B. melitensis 16M amiC mutant     |
| <a href="http://purl.obolibrary.org/obo/IDO_0110217">http://purl.obolibrary.org/obo/IDO_0110217</a> | B. melitensis 16M dsbA mutant     |
| <a href="http://purl.obolibrary.org/obo/IDO_0110220">http://purl.obolibrary.org/obo/IDO_0110220</a> | B. melitensis 16M cbbE mutant     |
| <a href="http://purl.obolibrary.org/obo/IDO_0110221">http://purl.obolibrary.org/obo/IDO_0110221</a> | B. melitensis 16M purL mutant     |
| <a href="http://purl.obolibrary.org/obo/IDO_0110222">http://purl.obolibrary.org/obo/IDO_0110222</a> | B. melitensis 16M glyA mutant     |
| <a href="http://purl.obolibrary.org/obo/IDO_0110224">http://purl.obolibrary.org/obo/IDO_0110224</a> | B. melitensis 16M galE mutant     |
| <a href="http://purl.obolibrary.org/obo/IDO_0110229">http://purl.obolibrary.org/obo/IDO_0110229</a> | B. melitensis 16M pyrC mutant     |
| <a href="http://purl.obolibrary.org/obo/IDO_0110230">http://purl.obolibrary.org/obo/IDO_0110230</a> | B. melitensis 16M spotT mutant    |
| <a href="http://purl.obolibrary.org/obo/IDO_0110231">http://purl.obolibrary.org/obo/IDO_0110231</a> | B. melitensis 16M lpsA mutant     |
| <a href="http://purl.obolibrary.org/obo/IDO_0110232">http://purl.obolibrary.org/obo/IDO_0110232</a> | B. melitensis 16M htrA mutant     |
| <a href="http://purl.obolibrary.org/obo/IDO_0110233">http://purl.obolibrary.org/obo/IDO_0110233</a> | B. melitensis 16M feuQ mutant     |
| <a href="http://purl.obolibrary.org/obo/IDO_0110234">http://purl.obolibrary.org/obo/IDO_0110234</a> | B. melitensis 16M feuP mutant     |
| <a href="http://purl.obolibrary.org/obo/IDO_0110235">http://purl.obolibrary.org/obo/IDO_0110235</a> | B. melitensis 16M BMEI1339 mutant |
| <a href="http://purl.obolibrary.org/obo/IDO_0110237">http://purl.obolibrary.org/obo/IDO_0110237</a> | B. melitensis 16M wbpZ mutant     |
| <a href="http://purl.obolibrary.org/obo/IDO_0110238">http://purl.obolibrary.org/obo/IDO_0110238</a> | B. melitensis 16M pmm mutant      |
| <a href="http://purl.obolibrary.org/obo/IDO_0110240">http://purl.obolibrary.org/obo/IDO_0110240</a> | B. melitensis 16M rfbD mutant     |
| <a href="http://purl.obolibrary.org/obo/IDO_0110241">http://purl.obolibrary.org/obo/IDO_0110241</a> | B. melitensis 16M perA mutant     |
| <a href="http://purl.obolibrary.org/obo/IDO_0110242">http://purl.obolibrary.org/obo/IDO_0110242</a> | B. melitensis 16M wbpL mutant     |
| <a href="http://purl.obolibrary.org/obo/IDO_0110243">http://purl.obolibrary.org/obo/IDO_0110243</a> | B. melitensis 16M dsbA mutant     |
| <a href="http://purl.obolibrary.org/obo/IDO_0110244">http://purl.obolibrary.org/obo/IDO_0110244</a> | B. melitensis 16M BMEI1443 mutant |

|                                                                                                     |                                    |
|-----------------------------------------------------------------------------------------------------|------------------------------------|
| <a href="http://purl.obolibrary.org/obo/IDO_0110245">http://purl.obolibrary.org/obo/IDO_0110245</a> | B. melitensis 16M BMEI1448 mutant  |
| <a href="http://purl.obolibrary.org/obo/IDO_0110246">http://purl.obolibrary.org/obo/IDO_0110246</a> | B. melitensis 16M thrC mutant      |
| <a href="http://purl.obolibrary.org/obo/IDO_0110248">http://purl.obolibrary.org/obo/IDO_0110248</a> | B. melitensis 16M purF mutant      |
| <a href="http://purl.obolibrary.org/obo/IDO_0110250">http://purl.obolibrary.org/obo/IDO_0110250</a> | B. melitensis 16M aroC mutant      |
| <a href="http://purl.obolibrary.org/obo/IDO_0110251">http://purl.obolibrary.org/obo/IDO_0110251</a> | B. melitensis 16M purD mutant      |
| <a href="http://purl.obolibrary.org/obo/IDO_0110252">http://purl.obolibrary.org/obo/IDO_0110252</a> | B. melitensis 16M BMEI1531 mutant  |
| <a href="http://purl.obolibrary.org/obo/IDO_0110253">http://purl.obolibrary.org/obo/IDO_0110253</a> | B. melitensis 16M bacA mutant      |
| <a href="http://purl.obolibrary.org/obo/IDO_0110255">http://purl.obolibrary.org/obo/IDO_0110255</a> | B. melitensis 16M vsrB mutant      |
| <a href="http://purl.obolibrary.org/obo/IDO_0110257">http://purl.obolibrary.org/obo/IDO_0110257</a> | B. melitensis 16M pgi mutant       |
| <a href="http://purl.obolibrary.org/obo/IDO_0110258">http://purl.obolibrary.org/obo/IDO_0110258</a> | B. melitensis 16M BMEI1658 mutant  |
| <a href="http://purl.obolibrary.org/obo/IDO_0110259">http://purl.obolibrary.org/obo/IDO_0110259</a> | B. melitensis 16M hisD mutant      |
| <a href="http://purl.obolibrary.org/obo/IDO_0110260">http://purl.obolibrary.org/obo/IDO_0110260</a> | B. melitensis 16M malK mutant      |
| <a href="http://purl.obolibrary.org/obo/IDO_0110262">http://purl.obolibrary.org/obo/IDO_0110262</a> | B. melitensis 16M metH mutant      |
| <a href="http://purl.obolibrary.org/obo/IDO_0110263">http://purl.obolibrary.org/obo/IDO_0110263</a> | B. melitensis 16M cysI mutant      |
| <a href="http://purl.obolibrary.org/obo/IDO_0110264">http://purl.obolibrary.org/obo/IDO_0110264</a> | B. melitensis 16M glnL mutant      |
| <a href="http://purl.obolibrary.org/obo/IDO_0110265">http://purl.obolibrary.org/obo/IDO_0110265</a> | B. melitensis 16M glnD mutant      |
| <a href="http://purl.obolibrary.org/obo/IDO_0110266">http://purl.obolibrary.org/obo/IDO_0110266</a> | B. melitensis 16M BMEI1809 mutant  |
| <a href="http://purl.obolibrary.org/obo/IDO_0110268">http://purl.obolibrary.org/obo/IDO_0110268</a> | B. melitensis 16M BMEI1844 mutant  |
| <a href="http://purl.obolibrary.org/obo/IDO_0110269">http://purl.obolibrary.org/obo/IDO_0110269</a> | B. melitensis 16M ilvD mutant      |
| <a href="http://purl.obolibrary.org/obo/IDO_0110270">http://purl.obolibrary.org/obo/IDO_0110270</a> | B. melitensis 16M cysY mutant      |
| <a href="http://purl.obolibrary.org/obo/IDO_0110271">http://purl.obolibrary.org/obo/IDO_0110271</a> | B. melitensis 16M BMEI1859 mutant  |
| <a href="http://purl.obolibrary.org/obo/IDO_0110272">http://purl.obolibrary.org/obo/IDO_0110272</a> | B. melitensis 16M BMEI1879 mutant  |
| <a href="http://purl.obolibrary.org/obo/IDO_0110274">http://purl.obolibrary.org/obo/IDO_0110274</a> | B. melitensis 16M BMEI1902 mutant  |
| <a href="http://purl.obolibrary.org/obo/IDO_0110276">http://purl.obolibrary.org/obo/IDO_0110276</a> | B. melitensis 16M rpsA mutant      |
| <a href="http://purl.obolibrary.org/obo/IDO_0110278">http://purl.obolibrary.org/obo/IDO_0110278</a> | B. melitensis 16M dnaK mutant      |
| <a href="http://purl.obolibrary.org/obo/IDO_0110279">http://purl.obolibrary.org/obo/IDO_0110279</a> | B. melitensis 16M bvrS mutant      |
| <a href="http://purl.obolibrary.org/obo/IDO_0110280">http://purl.obolibrary.org/obo/IDO_0110280</a> | B. melitensis 16M bvrR mutant      |
| <a href="http://purl.obolibrary.org/obo/IDO_0110281">http://purl.obolibrary.org/obo/IDO_0110281</a> | B. melitensis 16M hisF mutant      |
| <a href="http://purl.obolibrary.org/obo/IDO_0110283">http://purl.obolibrary.org/obo/IDO_0110283</a> | B. melitensis 16M hemH mutant      |
| <a href="http://purl.obolibrary.org/obo/IDO_0110284">http://purl.obolibrary.org/obo/IDO_0110284</a> | B. melitensis 16M virb1 mutant     |
| <a href="http://purl.obolibrary.org/obo/IDO_0110285">http://purl.obolibrary.org/obo/IDO_0110285</a> | B. melitensis 16M virB2 mutant     |
| <a href="http://purl.obolibrary.org/obo/IDO_0110287">http://purl.obolibrary.org/obo/IDO_0110287</a> | B. melitensis 16M virb4 mutant     |
| <a href="http://purl.obolibrary.org/obo/IDO_0110288">http://purl.obolibrary.org/obo/IDO_0110288</a> | B. melitensis 16M virB5 mutant     |
| <a href="http://purl.obolibrary.org/obo/IDO_0110291">http://purl.obolibrary.org/obo/IDO_0110291</a> | B. melitensis 16M virb9 mutant     |
| <a href="http://purl.obolibrary.org/obo/IDO_0110293">http://purl.obolibrary.org/obo/IDO_0110293</a> | B. melitensis 16M virb11 mutant    |
| <a href="http://purl.obolibrary.org/obo/IDO_0110296">http://purl.obolibrary.org/obo/IDO_0110296</a> | B. melitensis 16M nodV mutant      |
| <a href="http://purl.obolibrary.org/obo/IDO_0110297">http://purl.obolibrary.org/obo/IDO_0110297</a> | B. melitensis 16M mgtB mutant      |
| <a href="http://purl.obolibrary.org/obo/IDO_0110299">http://purl.obolibrary.org/obo/IDO_0110299</a> | B. melitensis 16M rbsK mutant      |
| <a href="http://purl.obolibrary.org/obo/IDO_0110301">http://purl.obolibrary.org/obo/IDO_0110301</a> | B. melitensis 16M BMEI10128 mutant |
| <a href="http://purl.obolibrary.org/obo/IDO_0110303">http://purl.obolibrary.org/obo/IDO_0110303</a> | B. melitensis 16M fliC mutant      |
| <a href="http://purl.obolibrary.org/obo/IDO_0110309">http://purl.obolibrary.org/obo/IDO_0110309</a> | B. melitensis 16M znuC mutant      |
| <a href="http://purl.obolibrary.org/obo/IDO_0110310">http://purl.obolibrary.org/obo/IDO_0110310</a> | B. melitensis 16M znuA mutant      |
| <a href="http://purl.obolibrary.org/obo/IDO_0110311">http://purl.obolibrary.org/obo/IDO_0110311</a> | B. melitensis 16M BMEI10274 mutant |

|                                                                                                     |                                    |
|-----------------------------------------------------------------------------------------------------|------------------------------------|
| <a href="http://purl.obolibrary.org/obo/IDO_0110313">http://purl.obolibrary.org/obo/IDO_0110313</a> | B. melitensis 16M cobW mutant      |
| <a href="http://purl.obolibrary.org/obo/IDO_0110314">http://purl.obolibrary.org/obo/IDO_0110314</a> | B. melitensis 16M BMEI10318 mutant |
| <a href="http://purl.obolibrary.org/obo/IDO_0110315">http://purl.obolibrary.org/obo/IDO_0110315</a> | B. melitensis 16M BMEI10336 mutant |
| <a href="http://purl.obolibrary.org/obo/IDO_0110316">http://purl.obolibrary.org/obo/IDO_0110316</a> | B. melitensis 16M dacF mutant      |
| <a href="http://purl.obolibrary.org/obo/IDO_0110321">http://purl.obolibrary.org/obo/IDO_0110321</a> | B. melitensis 16M eryB mutant      |
| <a href="http://purl.obolibrary.org/obo/IDO_0110322">http://purl.obolibrary.org/obo/IDO_0110322</a> | B. melitensis 16M gntR1 mutant     |
| <a href="http://purl.obolibrary.org/obo/IDO_0110323">http://purl.obolibrary.org/obo/IDO_0110323</a> | B. melitensis 16M galcD mutant     |
| <a href="http://purl.obolibrary.org/obo/IDO_0110324">http://purl.obolibrary.org/obo/IDO_0110324</a> | B. melitensis 16M nikA mutant      |
| <a href="http://purl.obolibrary.org/obo/IDO_0110325">http://purl.obolibrary.org/obo/IDO_0110325</a> | B. melitensis 16M zwf mutant       |
| <a href="http://purl.obolibrary.org/obo/IDO_0110329">http://purl.obolibrary.org/obo/IDO_0110329</a> | B. melitensis 16M sodC mutant      |
| <a href="http://purl.obolibrary.org/obo/IDO_0110333">http://purl.obolibrary.org/obo/IDO_0110333</a> | B. melitensis 16M BMEI10626 mutant |
| <a href="http://purl.obolibrary.org/obo/IDO_0110335">http://purl.obolibrary.org/obo/IDO_0110335</a> | B. melitensis 16M pyrC mutant      |
| <a href="http://purl.obolibrary.org/obo/IDO_0110337">http://purl.obolibrary.org/obo/IDO_0110337</a> | B. melitensis 16M aidB mutant      |
| <a href="http://purl.obolibrary.org/obo/IDO_0110338">http://purl.obolibrary.org/obo/IDO_0110338</a> | B. melitensis 16M rbsC mutant      |
| <a href="http://purl.obolibrary.org/obo/IDO_0110340">http://purl.obolibrary.org/obo/IDO_0110340</a> | B. melitensis 16M cydC mutant      |
| <a href="http://purl.obolibrary.org/obo/IDO_0110343">http://purl.obolibrary.org/obo/IDO_0110343</a> | B. melitensis 16M glpK mutant      |
| <a href="http://purl.obolibrary.org/obo/IDO_0110344">http://purl.obolibrary.org/obo/IDO_0110344</a> | B. melitensis 16M xfp mutant       |
| <a href="http://purl.obolibrary.org/obo/IDO_0110345">http://purl.obolibrary.org/obo/IDO_0110345</a> | B. melitensis 16M manB mutant      |
| <a href="http://purl.obolibrary.org/obo/IDO_0110346">http://purl.obolibrary.org/obo/IDO_0110346</a> | B. melitensis 16M wbpW mutant      |
| <a href="http://purl.obolibrary.org/obo/IDO_0110350">http://purl.obolibrary.org/obo/IDO_0110350</a> | B. melitensis 16M BMEI10935 mutant |
| <a href="http://purl.obolibrary.org/obo/IDO_0110351">http://purl.obolibrary.org/obo/IDO_0110351</a> | B. melitensis 16M narG mutant      |
| <a href="http://purl.obolibrary.org/obo/IDO_0110354">http://purl.obolibrary.org/obo/IDO_0110354</a> | B. melitensis 16M BMEI11045 mutant |
| <a href="http://purl.obolibrary.org/obo/IDO_0110356">http://purl.obolibrary.org/obo/IDO_0110356</a> | B. melitensis 16M gntR mutant      |
| <a href="http://purl.obolibrary.org/obo/IDO_0110358">http://purl.obolibrary.org/obo/IDO_0110358</a> | B. melitensis 16M deoR mutant      |
| <a href="http://purl.obolibrary.org/obo/IDO_0110359">http://purl.obolibrary.org/obo/IDO_0110359</a> | B. melitensis 16M gtrB mutant      |
| <a href="http://purl.obolibrary.org/obo/IDO_0110360">http://purl.obolibrary.org/obo/IDO_0110360</a> | B. melitensis 16M vjbR mutant      |
| <a href="http://purl.obolibrary.org/obo/IDO_0110362">http://purl.obolibrary.org/obo/IDO_0110362</a> | B. abortus 2308 methH mutant       |
| <a href="http://purl.obolibrary.org/obo/IDO_0110363">http://purl.obolibrary.org/obo/IDO_0110363</a> | B. abortus 2308 pgi mutant         |
| <a href="http://purl.obolibrary.org/obo/IDO_0110365">http://purl.obolibrary.org/obo/IDO_0110365</a> | B. abortus 2308 uvrA mutant        |
| <a href="http://purl.obolibrary.org/obo/IDO_0110366">http://purl.obolibrary.org/obo/IDO_0110366</a> | B. abortus 2308 miaA mutant        |
| <a href="http://purl.obolibrary.org/obo/IDO_0110367">http://purl.obolibrary.org/obo/IDO_0110367</a> | B. abortus 2308 aroC mutant        |
| <a href="http://purl.obolibrary.org/obo/IDO_0110369">http://purl.obolibrary.org/obo/IDO_0110369</a> | B. abortus 2308 bacA mutant        |
| <a href="http://purl.obolibrary.org/obo/IDO_0110370">http://purl.obolibrary.org/obo/IDO_0110370</a> | B. abortus 2308 cysl mutant        |
| <a href="http://purl.obolibrary.org/obo/IDO_0110371">http://purl.obolibrary.org/obo/IDO_0110371</a> | B. abortus 2308 dut mutant         |
| <a href="http://purl.obolibrary.org/obo/IDO_0110372">http://purl.obolibrary.org/obo/IDO_0110372</a> | B. abortus 2308 glnA mutant        |
| <a href="http://purl.obolibrary.org/obo/IDO_0110373">http://purl.obolibrary.org/obo/IDO_0110373</a> | B. abortus 2308 gloA mutant        |
| <a href="http://purl.obolibrary.org/obo/IDO_0110374">http://purl.obolibrary.org/obo/IDO_0110374</a> | B. abortus 2308 glyA mutant        |
| <a href="http://purl.obolibrary.org/obo/IDO_0110376">http://purl.obolibrary.org/obo/IDO_0110376</a> | B. abortus 2308 hfq mutant         |
| <a href="http://purl.obolibrary.org/obo/IDO_0110378">http://purl.obolibrary.org/obo/IDO_0110378</a> | B. abortus 2308 hisD mutant        |
| <a href="http://purl.obolibrary.org/obo/IDO_0110379">http://purl.obolibrary.org/obo/IDO_0110379</a> | B. abortus 2308 hisF mutant        |
| <a href="http://purl.obolibrary.org/obo/IDO_0110380">http://purl.obolibrary.org/obo/IDO_0110380</a> | B. abortus 2308 hpt mutant         |
| <a href="http://purl.obolibrary.org/obo/IDO_0110381">http://purl.obolibrary.org/obo/IDO_0110381</a> | B. abortus 2308 ilvD mutant        |
| <a href="http://purl.obolibrary.org/obo/IDO_0110382">http://purl.obolibrary.org/obo/IDO_0110382</a> | B. abortus 2308 leuA mutant        |



|                                                                                                     |                                   |
|-----------------------------------------------------------------------------------------------------|-----------------------------------|
| <a href="http://purl.obolibrary.org/obo/IDO_0110383">http://purl.obolibrary.org/obo/IDO_0110383</a> | B. abortus 2308 leuC mutant       |
| <a href="http://purl.obolibrary.org/obo/IDO_0110384">http://purl.obolibrary.org/obo/IDO_0110384</a> | B. abortus 2308 lysA mutant       |
| <a href="http://purl.obolibrary.org/obo/IDO_0110390">http://purl.obolibrary.org/obo/IDO_0110390</a> | B. abortus 2308 pheA mutant       |
| <a href="http://purl.obolibrary.org/obo/IDO_0110391">http://purl.obolibrary.org/obo/IDO_0110391</a> | B. abortus 2308 pth mutant        |
| <a href="http://purl.obolibrary.org/obo/IDO_0110392">http://purl.obolibrary.org/obo/IDO_0110392</a> | B. abortus 2308 purD mutant       |
| <a href="http://purl.obolibrary.org/obo/IDO_0110393">http://purl.obolibrary.org/obo/IDO_0110393</a> | B. abortus 2308 purF mutant       |
| <a href="http://purl.obolibrary.org/obo/IDO_0110394">http://purl.obolibrary.org/obo/IDO_0110394</a> | B. abortus 2308 purH mutant       |
| <a href="http://purl.obolibrary.org/obo/IDO_0110397">http://purl.obolibrary.org/obo/IDO_0110397</a> | B. abortus 2308 pyc mutant        |
| <a href="http://purl.obolibrary.org/obo/IDO_0110400">http://purl.obolibrary.org/obo/IDO_0110400</a> | B. abortus 2308 rfbD mutant       |
| <a href="http://purl.obolibrary.org/obo/IDO_0110401">http://purl.obolibrary.org/obo/IDO_0110401</a> | B. abortus 2308 rplS mutant       |
| <a href="http://purl.obolibrary.org/obo/IDO_0110403">http://purl.obolibrary.org/obo/IDO_0110403</a> | B. abortus 2308 rpsA mutant       |
| <a href="http://purl.obolibrary.org/obo/IDO_0110408">http://purl.obolibrary.org/obo/IDO_0110408</a> | B. abortus 2308 znuA mutant       |
| <a href="http://purl.obolibrary.org/obo/IDO_0110409">http://purl.obolibrary.org/obo/IDO_0110409</a> | B. abortus 2308 znuC mutant       |
| <a href="http://purl.obolibrary.org/obo/IDO_0110412">http://purl.obolibrary.org/obo/IDO_0110412</a> | B. abortus 2308 sodC mutant       |
| <a href="http://purl.obolibrary.org/obo/IDO_0110415">http://purl.obolibrary.org/obo/IDO_0110415</a> | B. abortus 2308 narG mutant       |
| <a href="http://purl.obolibrary.org/obo/IDO_0110416">http://purl.obolibrary.org/obo/IDO_0110416</a> | B. abortus 2308 virB5 mutant      |
| <a href="http://purl.obolibrary.org/obo/IDO_0110418">http://purl.obolibrary.org/obo/IDO_0110418</a> | B. abortus 2308 virB2 mutant      |
| <a href="http://purl.obolibrary.org/obo/IDO_0110424">http://purl.obolibrary.org/obo/IDO_0110424</a> | B. abortus 2308 gcvT mutant       |
| <a href="http://purl.obolibrary.org/obo/IDO_0110427">http://purl.obolibrary.org/obo/IDO_0110427</a> | B. abortus 2308 hemH mutant       |
| <a href="http://purl.obolibrary.org/obo/IDO_0110428">http://purl.obolibrary.org/obo/IDO_0110428</a> | B. melitensis 16M BMEI0066 mutant |
| <a href="http://purl.obolibrary.org/obo/IDO_0110431">http://purl.obolibrary.org/obo/IDO_0110431</a> | B. abortus 2308 pgk mutant        |

#####
