# Supplementary material for: Ontology-based representation and analysis of host-Brucella interactions
Source: PubMed Central journal article supplement (PMC4594885; doi:10.1186/s13326-015-0036-y), 2015-10-05
Supplement: 13326_2015_36_MOESM4_ESM.pdf [file 13326_2015_36_MOESM4_ESM.pdf]

## Supplemental file – SPARQL queries of *Brucella* Protein Virulence Factors important for *Brucella* intracellular replication in macrophages

This supplemental file includes two scripts, both related to the queries of the protein virulence factors that are related with *Brucella* intracellular replication in macrophages.

- SPARQL query 2: SPARQL query of the total of all the protein virulence factors that are related with *Brucella* intracellular replication in macrophages.
- SPARQL query 2.1: SPARQL query of the list of all the protein virulence factors that are related with *Brucella* intracellular replication in macrophages.

```
#####
```

```
#this query was running on http://sparql.hegroup.org/sparql
```

```
# Date: on 3/24/2015
```

```
# IDOBRU version: 86
```

```
#
```

```
#####
```

```
#SPARQL query2: the total of all the protein virulence factors that are related with Brucella intracellular replication in macrophages.
```

```
# BFO_0000051 has part;
```

```
# IDO_0101168 agent_in_compromised_process;
```

```
# IDO_0100612 Brucella intracellular replication in macrophage
```

```
prefix rdf: <http://www.w3.org/1999/02/22-rdf-syntax-ns#>
```

```
prefix owl: <http://www.w3.org/2002/07/owl#>
```

```
SELECT (count(distinct ?s) as ?count)
```

```
from <http://purl.obolibrary.org/obo/merged/IDOBRU>
```

```
WHERE {
```

```
  ?n2 rdfs:subClassOf ?s1 .
```

```
  ?s1 owl:complementOf ?s2 .
```

```
  ?s2 owl:onProperty <http://purl.obolibrary.org/obo/BFO_0000051>; owl:someValuesFrom ?s .
```

```
  ?s rdfs:label ?l .
```

```
{
```

```
  SELECT ?n2
```

```
  WHERE
```

```
{
```

```
  ?n rdfs:subClassOf ?n1 .
```

```
  ?n1 owl:onProperty <http://purl.obolibrary.org/obo/IDO_0101168>; owl:someValuesFrom  
<http://purl.obolibrary.org/obo/IDO_0100612>.
```

```
  ?n2 rdfs:subClassOf ?n .
```

```
}
```

```
}
```

```
FILTER REGEX(str(?s), "PR") .
```

```
}
```

```
#####
```

```
#Result: (as returned by the server on 3/24/2015 12:31am)
```

```
count
```

```
81
```

```
#####
```

```
#SPARQL query2.1: the list of all the protein virulence factors that are related with Brucella intracellular replication in macrophages.
```

```
# IDO_0100738 lacks_part;
```

```
# IDO_0101168 agent_in_compromised_process;
```

```
# IDO_0100612 Brucella intracellular replication in macrophage
```

```
prefix rdf: <http://www.w3.org/1999/02/22-rdf-syntax-ns#>
```

```
prefix owl: <http://www.w3.org/2002/07/owl#>
```

```
SELECT ?s ?l
```

```
from <http://purl.obolibrary.org/obo/merged/IDOBRU>
```

```
WHERE {
```

```
  ?n2 rdfs:subClassOf ?s1 .
```

```
  ?s1 owl:complementOf ?s2 .
```

```
  ?s2 owl:onProperty <http://purl.obolibrary.org/obo/BFO_0000051>; owl:someValuesFrom ?s .
```

```
  ?s rdfs:label ?l .
```

```
{
```

```
  SELECT ?n2
```

```
  WHERE
```

```
  {
```

```
    ?n rdfs:subClassOf ?n1 .
```

```
    ?n1 owl:onProperty <http://purl.obolibrary.org/obo/IDO_0101168>; owl:someValuesFrom  
<http://purl.obolibrary.org/obo/IDO_0100612>.
```

```
    ?n2 rdfs:subClassOf ?n .
```

```
  }
```

```
  }
```

```
  FILTER REGEX(str(?s), "PR") .
```

```
}
```

```
#####
```

```
#Result:(as returned by the server on 3/24/2015 12:36am)
```

| <b>s</b>                                                                                        | <b>I</b>                                                                                 |
|-------------------------------------------------------------------------------------------------|------------------------------------------------------------------------------------------|
| <a href="http://purl.obolibrary.org/obo/PR_Q9RPY4">http://purl.obolibrary.org/obo/PR_Q9RPY4</a> | type IV secretion system protein VirB1                                                   |
| <a href="http://purl.obolibrary.org/obo/PR_Q8YDZ5">http://purl.obolibrary.org/obo/PR_Q8YDZ5</a> | attachment mediating protein VIRB1-like protein                                          |
| <a href="http://purl.obolibrary.org/obo/PR_Q9RPY3">http://purl.obolibrary.org/obo/PR_Q9RPY3</a> | VirB2                                                                                    |
| <a href="http://purl.obolibrary.org/obo/PR_Q2YIT6">http://purl.obolibrary.org/obo/PR_Q2YIT6</a> | type IV secretion system protein VirB2 KO: K03197 type IV secretion system protein VirB2 |
| <a href="http://purl.obolibrary.org/obo/PR_Q7CEG0">http://purl.obolibrary.org/obo/PR_Q7CEG0</a> | type IV secretion system protein VirB2                                                   |
| <a href="http://purl.obolibrary.org/obo/PR_P52558">http://purl.obolibrary.org/obo/PR_P52558</a> | PHOSPHORIBOSYLAMINOIMIDAZOLE CARBOXYLASE CATALYTIC SUBUNIT                               |
| <a href="http://purl.obolibrary.org/obo/PR_Q8G183">http://purl.obolibrary.org/obo/PR_Q8G183</a> | phosphoribosylformylglycinamide synthase II                                              |
| <a href="http://purl.obolibrary.org/obo/PR_Q8YGN1">http://purl.obolibrary.org/obo/PR_Q8YGN1</a> | phosphoribosylformylglycinamide synthase II                                              |
| <a href="http://purl.obolibrary.org/obo/PR_Q2YMD3">http://purl.obolibrary.org/obo/PR_Q2YMD3</a> | phosphoribosylamine--glycine ligase                                                      |
| <a href="http://purl.obolibrary.org/obo/PR_Q8G2B1">http://purl.obolibrary.org/obo/PR_Q8G2B1</a> | phosphoribosylamine--glycine ligase                                                      |
| <a href="http://purl.obolibrary.org/obo/PR_Q8YFK1">http://purl.obolibrary.org/obo/PR_Q8YFK1</a> | phosphoribosylamine--glycine ligase                                                      |
| <a href="http://purl.obolibrary.org/obo/PR_Q8G353">http://purl.obolibrary.org/obo/PR_Q8G353</a> | dihydroxy-acid dehydratase                                                               |
| <a href="http://purl.obolibrary.org/obo/PR_Q2YNW9">http://purl.obolibrary.org/obo/PR_Q2YNW9</a> | dihydroxy-acid dehydratase                                                               |
| <a href="http://purl.obolibrary.org/obo/PR_Q8YEN0">http://purl.obolibrary.org/obo/PR_Q8YEN0</a> | dihydroxy-acid dehydratase                                                               |
| <a href="http://purl.obolibrary.org/obo/PR_Q8FZL6">http://purl.obolibrary.org/obo/PR_Q8FZL6</a> | pyrazinamidase/nicotinamidase                                                            |
| <a href="http://purl.obolibrary.org/obo/PR_Q8YIA0">http://purl.obolibrary.org/obo/PR_Q8YIA0</a> | INTEGRAL MEMBRANE PROTEIN                                                                |
| <a href="http://purl.obolibrary.org/obo/PR_Q8FZL5">http://purl.obolibrary.org/obo/PR_Q8FZL5</a> | hypothetical protein                                                                     |
| <a href="http://purl.obolibrary.org/obo/PR_P0A3G8">http://purl.obolibrary.org/obo/PR_P0A3G8</a> | RNA-binding protein Hfq                                                                  |
| <a href="http://purl.obolibrary.org/obo/PR_P0A3G7">http://purl.obolibrary.org/obo/PR_P0A3G7</a> | RNA-binding protein Hfq                                                                  |
| <a href="http://purl.obolibrary.org/obo/PR_Q2YPW9">http://purl.obolibrary.org/obo/PR_Q2YPW9</a> | RNA-binding protein Hfq                                                                  |
| <a href="http://purl.obolibrary.org/obo/PR_Q2YN95">http://purl.obolibrary.org/obo/PR_Q2YN95</a> | serine hydroxymethyltransferase                                                          |
| <a href="http://purl.obolibrary.org/obo/PR_Q8YGG7">http://purl.obolibrary.org/obo/PR_Q8YGG7</a> | SERINE HYDROXYMETHYLTRANSFERASE                                                          |
| <a href="http://purl.obolibrary.org/obo/PR_Q8G1F1">http://purl.obolibrary.org/obo/PR_Q8G1F1</a> | serine hydroxymethyltransferase                                                          |
| <a href="http://purl.obolibrary.org/obo/PR_Q8YF59">http://purl.obolibrary.org/obo/PR_Q8YF59</a> | histidinol dehydrogenase                                                                 |
| <a href="http://purl.obolibrary.org/obo/PR_Q8G2R2">http://purl.obolibrary.org/obo/PR_Q8G2R2</a> | histidinol dehydrogenase                                                                 |
| <a href="http://purl.obolibrary.org/obo/PR_Q2YPB8">http://purl.obolibrary.org/obo/PR_Q2YPB8</a> | histidinol dehydrogenase                                                                 |
| <a href="http://purl.obolibrary.org/obo/PR_Q8YIJ3">http://purl.obolibrary.org/obo/PR_Q8YIJ3</a> | 2-isopropylmalate synthase                                                               |
| <a href="http://purl.obolibrary.org/obo/PR_Q2YRT1">http://purl.obolibrary.org/obo/PR_Q2YRT1</a> | 2-isopropylmalate synthase                                                               |
| <a href="http://purl.obolibrary.org/obo/PR_Q8FZC4">http://purl.obolibrary.org/obo/PR_Q8FZC4</a> | 2-isopropylmalate synthase                                                               |
| <a href="http://purl.obolibrary.org/obo/PR_Q8YJC9">http://purl.obolibrary.org/obo/PR_Q8YJC9</a> | isopropylmalate isomerase large subunit                                                  |
| <a href="http://purl.obolibrary.org/obo/PR_Q8FYG9">http://purl.obolibrary.org/obo/PR_Q8FYG9</a> | isopropylmalate isomerase large subunit                                                  |
| <a href="http://purl.obolibrary.org/obo/PR_Q2YLP7">http://purl.obolibrary.org/obo/PR_Q2YLP7</a> | isopropylmalate isomerase large subunit                                                  |

|                                                                                                 |                                                                                                                                   |
|-------------------------------------------------------------------------------------------------|-----------------------------------------------------------------------------------------------------------------------------------|
| <a href="http://purl.obolibrary.org/obo/PR_Q8FYA2">http://purl.obolibrary.org/obo/PR_Q8FYA2</a> | diaminopimelate decarboxylase                                                                                                     |
| <a href="http://purl.obolibrary.org/obo/PR_Q2YR85">http://purl.obolibrary.org/obo/PR_Q2YR85</a> | Orn/DAP/Arg decarboxylase, family 2:ATP/GTP-binding site motif A (P-loop):Diaminopimelate decarboxylase                           |
| <a href="http://purl.obolibrary.org/obo/PR_Q8YJJ9">http://purl.obolibrary.org/obo/PR_Q8YJJ9</a> | DIAMINOPIMELATE DECARBOXYLASE                                                                                                     |
| <a href="http://purl.obolibrary.org/obo/PR_Q8G0D9">http://purl.obolibrary.org/obo/PR_Q8G0D9</a> | undecaprenyl diphosphate synthase                                                                                                 |
| <a href="http://purl.obolibrary.org/obo/PR_Q8YHH3">http://purl.obolibrary.org/obo/PR_Q8YHH3</a> | UNDECAPRENYL PYROPHOSPHATE SYNTHETASE                                                                                             |
| <a href="http://purl.obolibrary.org/obo/PR_Q8CY40">http://purl.obolibrary.org/obo/PR_Q8CY40</a> | tRNA delta(2)-isopentenylpyrophosphate transferase                                                                                |
| <a href="http://purl.obolibrary.org/obo/PR_Q2YS31">http://purl.obolibrary.org/obo/PR_Q2YS31</a> | tRNA delta(2)-isopentenylpyrophosphate transferase                                                                                |
| <a href="http://purl.obolibrary.org/obo/PR_Q8YI29">http://purl.obolibrary.org/obo/PR_Q8YI29</a> | tRNA delta(2)-isopentenylpyrophosphate transferase                                                                                |
| <a href="http://purl.obolibrary.org/obo/PR_Q8FV62">http://purl.obolibrary.org/obo/PR_Q8FV62</a> | cobalamin synthesis protein/P47K family protein                                                                                   |
| <a href="http://purl.obolibrary.org/obo/PR_Q8YD69">http://purl.obolibrary.org/obo/PR_Q8YD69</a> | LOW AFFINITY ZINC TRANSPORT MEMBRANE PROTEIN                                                                                      |
| <a href="http://purl.obolibrary.org/obo/PR_Q8G2F1">http://purl.obolibrary.org/obo/PR_Q8G2F1</a> | transport protein                                                                                                                 |
| <a href="http://purl.obolibrary.org/obo/PR_Q8YFG9">http://purl.obolibrary.org/obo/PR_Q8YFG9</a> | transport protein                                                                                                                 |
| <a href="http://purl.obolibrary.org/obo/PR_Q2YMA1">http://purl.obolibrary.org/obo/PR_Q2YMA1</a> | transport protein                                                                                                                 |
| <a href="http://purl.obolibrary.org/obo/PR_Q8YF86">http://purl.obolibrary.org/obo/PR_Q8YF86</a> | glucose-6-phosphate isomerase                                                                                                     |
| <a href="http://purl.obolibrary.org/obo/PR_Q8G2N3">http://purl.obolibrary.org/obo/PR_Q8G2N3</a> | glucose-6-phosphate isomerase                                                                                                     |
| <a href="http://purl.obolibrary.org/obo/PR_Q2YPF3">http://purl.obolibrary.org/obo/PR_Q2YPF3</a> | glucose-6-phosphate isomerase                                                                                                     |
| <a href="http://purl.obolibrary.org/obo/PR_Q7CEG3">http://purl.obolibrary.org/obo/PR_Q7CEG3</a> | type IV secretion system protein VirB8                                                                                            |
| <a href="http://purl.obolibrary.org/obo/PR_Q2YJ78">http://purl.obolibrary.org/obo/PR_Q2YJ78</a> | VirB8                                                                                                                             |
| <a href="http://purl.obolibrary.org/obo/PR_Q9RPX7">http://purl.obolibrary.org/obo/PR_Q9RPX7</a> | VirB8                                                                                                                             |
| <a href="http://purl.obolibrary.org/obo/PR_Q9RPX6">http://purl.obolibrary.org/obo/PR_Q9RPX6</a> | type IV secretion system protein VirB9                                                                                            |
| <a href="http://purl.obolibrary.org/obo/PR_Q8YDZ1">http://purl.obolibrary.org/obo/PR_Q8YDZ1</a> | CHANNEL PROTEIN VIRB9 HOMOLOG                                                                                                     |
| <a href="http://purl.obolibrary.org/obo/PR_Q8YDZ0">http://purl.obolibrary.org/obo/PR_Q8YDZ0</a> | channel protein VIRB10-like protein                                                                                               |
| <a href="http://purl.obolibrary.org/obo/PR_Q9RPX5">http://purl.obolibrary.org/obo/PR_Q9RPX5</a> | type IV secretion system protein VirB10                                                                                           |
| <a href="http://purl.obolibrary.org/obo/PR_Q9RPY1">http://purl.obolibrary.org/obo/PR_Q9RPY1</a> | type IV secretion system protein VirB4                                                                                            |
| <a href="http://purl.obolibrary.org/obo/PR_Q8FWZ3">http://purl.obolibrary.org/obo/PR_Q8FWZ3</a> | respiratory nitrate reductase, alpha subunit                                                                                      |
| <a href="http://purl.obolibrary.org/obo/PR_Q8YBF0">http://purl.obolibrary.org/obo/PR_Q8YBF0</a> | NITRATE REDUCTASE ALPHA CHAIN                                                                                                     |
| <a href="http://purl.obolibrary.org/obo/PR_Q2YJY4">http://purl.obolibrary.org/obo/PR_Q2YJY4</a> | Nitrate reductase, alpha subunit:Prokaryotic molybdopterin oxidoreductase:Molybdopterin oxidoreductase:Molybdopterin dinucleot... |
| <a href="http://purl.obolibrary.org/obo/PR_Q8FW88">http://purl.obolibrary.org/obo/PR_Q8FW88</a> | phosphatidylcholine synthase                                                                                                      |

|                                                                                                 |                                                                                                                                  |
|-------------------------------------------------------------------------------------------------|----------------------------------------------------------------------------------------------------------------------------------|
| <a href="http://purl.obolibrary.org/obo/PR_Q8YH25">http://purl.obolibrary.org/obo/PR_Q8YH25</a> | GLUTAMINE SYNTHETASE                                                                                                             |
| <a href="http://purl.obolibrary.org/obo/PR_Q2YQ67">http://purl.obolibrary.org/obo/PR_Q2YQ67</a> | Glutamine synthetase class-I, adenylation site:Glutamine synthetase type I:Glutamine synthetase, catalytic domain:Glutamine s... |
| <a href="http://purl.obolibrary.org/obo/PR_Q8G0T3">http://purl.obolibrary.org/obo/PR_Q8G0T3</a> | glutamine synthetase, type I                                                                                                     |
| <a href="http://purl.obolibrary.org/obo/PR_Q8YI30">http://purl.obolibrary.org/obo/PR_Q8YI30</a> | PHOSPHOSERINE PHOSPHATASE                                                                                                        |
| <a href="http://purl.obolibrary.org/obo/PR_Q8FZT1">http://purl.obolibrary.org/obo/PR_Q8FZT1</a> | phosphoserine phosphatase                                                                                                        |
| <a href="http://purl.obolibrary.org/obo/PR_P64005">http://purl.obolibrary.org/obo/PR_P64005</a> | deoxyuridine 5'-triphosphate nucleotidohydrolase                                                                                 |
| <a href="http://purl.obolibrary.org/obo/PR_Q2YRG4">http://purl.obolibrary.org/obo/PR_Q2YRG4</a> | deoxyuridine 5'-triphosphate nucleotidohydrolase                                                                                 |
| <a href="http://purl.obolibrary.org/obo/PR_Q8FZ27">http://purl.obolibrary.org/obo/PR_Q8FZ27</a> | transcriptional regulator, AsnC family                                                                                           |
| <a href="http://purl.obolibrary.org/obo/PR_P64004">http://purl.obolibrary.org/obo/PR_P64004</a> | deoxyuridine 5'-triphosphate nucleotidohydrolase                                                                                 |
| <a href="http://purl.obolibrary.org/obo/PR_Q8YE37">http://purl.obolibrary.org/obo/PR_Q8YE37</a> | imidazole glycerol phosphate synthase subunit HisF                                                                               |
| <a href="http://purl.obolibrary.org/obo/PR_Q2YQY8">http://purl.obolibrary.org/obo/PR_Q2YQY8</a> | imidazole glycerol phosphate synthase subunit HisF                                                                               |
| <a href="http://purl.obolibrary.org/obo/PR_Q8FY07">http://purl.obolibrary.org/obo/PR_Q8FY07</a> | imidazole glycerol phosphate synthase subunit HisF                                                                               |
| <a href="http://purl.obolibrary.org/obo/PR_Q8FY04">http://purl.obolibrary.org/obo/PR_Q8FY04</a> | DNA-binding response regulator BvrR, putative                                                                                    |
| <a href="http://purl.obolibrary.org/obo/PR_Q8YE42">http://purl.obolibrary.org/obo/PR_Q8YE42</a> | TRANSCRIPTIONAL REGULATORY PROTEIN CHVI                                                                                          |
| <a href="http://purl.obolibrary.org/obo/PR_Q8YE76">http://purl.obolibrary.org/obo/PR_Q8YE76</a> | molecular chaperone DnaK                                                                                                         |
| <a href="http://purl.obolibrary.org/obo/PR_Q8FXX2">http://purl.obolibrary.org/obo/PR_Q8FXX2</a> | molecular chaperone DnaK                                                                                                         |
| <a href="http://purl.obolibrary.org/obo/PR_Q8FXX0">http://purl.obolibrary.org/obo/PR_Q8FXX0</a> | phospholipid N-methyltransferase                                                                                                 |
| <a href="http://purl.obolibrary.org/obo/PR_Q8YE43">http://purl.obolibrary.org/obo/PR_Q8YE43</a> | SENSOR PROTEIN CHVG                                                                                                              |
| <a href="http://purl.obolibrary.org/obo/PR_Q8FY03">http://purl.obolibrary.org/obo/PR_Q8FY03</a> | sensor histidine kinase BvrS, putative                                                                                           |
| <a href="http://purl.obolibrary.org/obo/PR_Q8YDZ4">http://purl.obolibrary.org/obo/PR_Q8YDZ4</a> | ATPASE VIRB4 HOMOLOG                                                                                                             |
| <a href="http://purl.obolibrary.org/obo/PR_Q8YJL6">http://purl.obolibrary.org/obo/PR_Q8YJL6</a> | two component response regulator                                                                                                 |
